# Supplementary material for: Engineered phage-silver nanoparticle complexes as a new tool for targeted therapies
Source: Springer Nature journal article supplement (doi:10.1038/s41598-025-05069-y), 2025-10-16
Supplement: MOESM1 [file 41598_2025_5069_MOESM1_ESM.doc]

**Supplementary material**

**Engineered Phage and Silver Nanoparticle Complexes as a New Tool for Targeted Therapies**

**De Plano Laura Maria**1+, **Morganti Dario**1,+**, Nicotra Giuseppe**2**, Paolo Calorenni**1,+**, Emanuele Luigi Sciuto**1**, Salvatore Oddo**1**, Conoci Sabrina**1, 3, 4*

1 Department of Chemical, Biological, Pharmaceutical and Environmental Sciences (ChiBioFarAm), University of Messina, Viale F. Stagno d'Alcontres 31, Messina, 98166, Italy

2 Istituto per la Microelettronica e Microsistemi, Consiglio Nazionale delle Ricerche (CNR-IMM), Catania, Italy

3 Department of Chemistry “Giacomo Ciamician”, University of Bologna, Via Selmi 2, Bologna, 40126, Italy

4 LAB Sense Beyond Nano - URT Department of Sciences Physics and Technologies of Matter (DSFTM) CNR,

+these authors contributed equally to this work

*Corresponding author : [sabrina.conoci@unime.it](mailto:sabrina.conoci@unime.it)

| Sample | **Li5surnatant**  (these phages do not take part in the complex) | **Li5**  (*(f):* Li5 input- surnatant) |
| --- | --- | --- |
| **Li5input** | 5 x1012 TU/mL |  |
| CTR (AgNPs/TBS) | 0 | 0 |
| AgNPs@Li5 TBS pH 5 | 2.15 x1012 TU/mL  43% | 2.85 x1012 TU/mL  57% |
| AgNPs@Li5 TBS pH 6 | 4.17 x1012 TU/mL  83% | 8.3 x1011 TU/mL  17% |
| CTR (Ag NPs/PBS) | 0 | 0 |
| AgNPs@Li5 PBS pH5 | 3 x1012 TU/mL  60% | 2 x1012 TU/mL  40% |
| AgNPs@Li5 PBS pH 6 | 1.6 x1012 TU/mL  32% | 3.4 x1012 TU/mL  68% |

**Figure S1: Number of phages present in the Input and Output (supernatant) of the samples**. An indirect quantification of the phage was performed by calculating the difference between the phage input (5 x 1012 TU/mL) and the amount of phage found in the supernatant after functionalization with AgNPs.

**
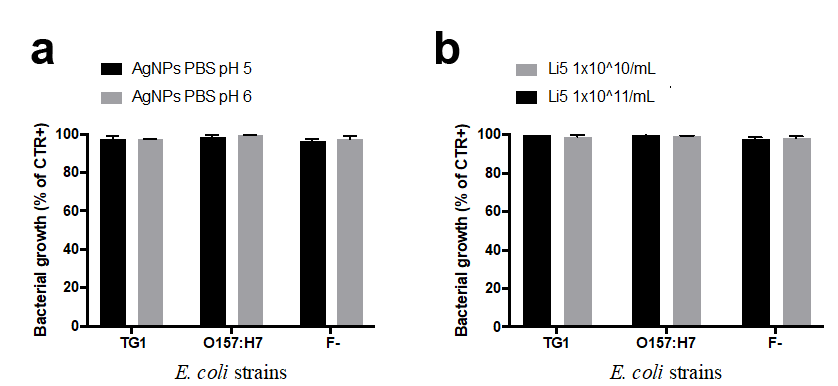
**

**Figure S2: Antibacterial activity of AgNPs/PBS and Li5 phage.** The graphs show the percentage of cell viability of the three E. coli strains recognized by the Li5 phage after 18 hours of incubation with AgNPs/PBS (a) and Li5 (b), at the indicated pHs and concentrations. The data were analyzed by two-way ANOVA, and no significant difference was found.


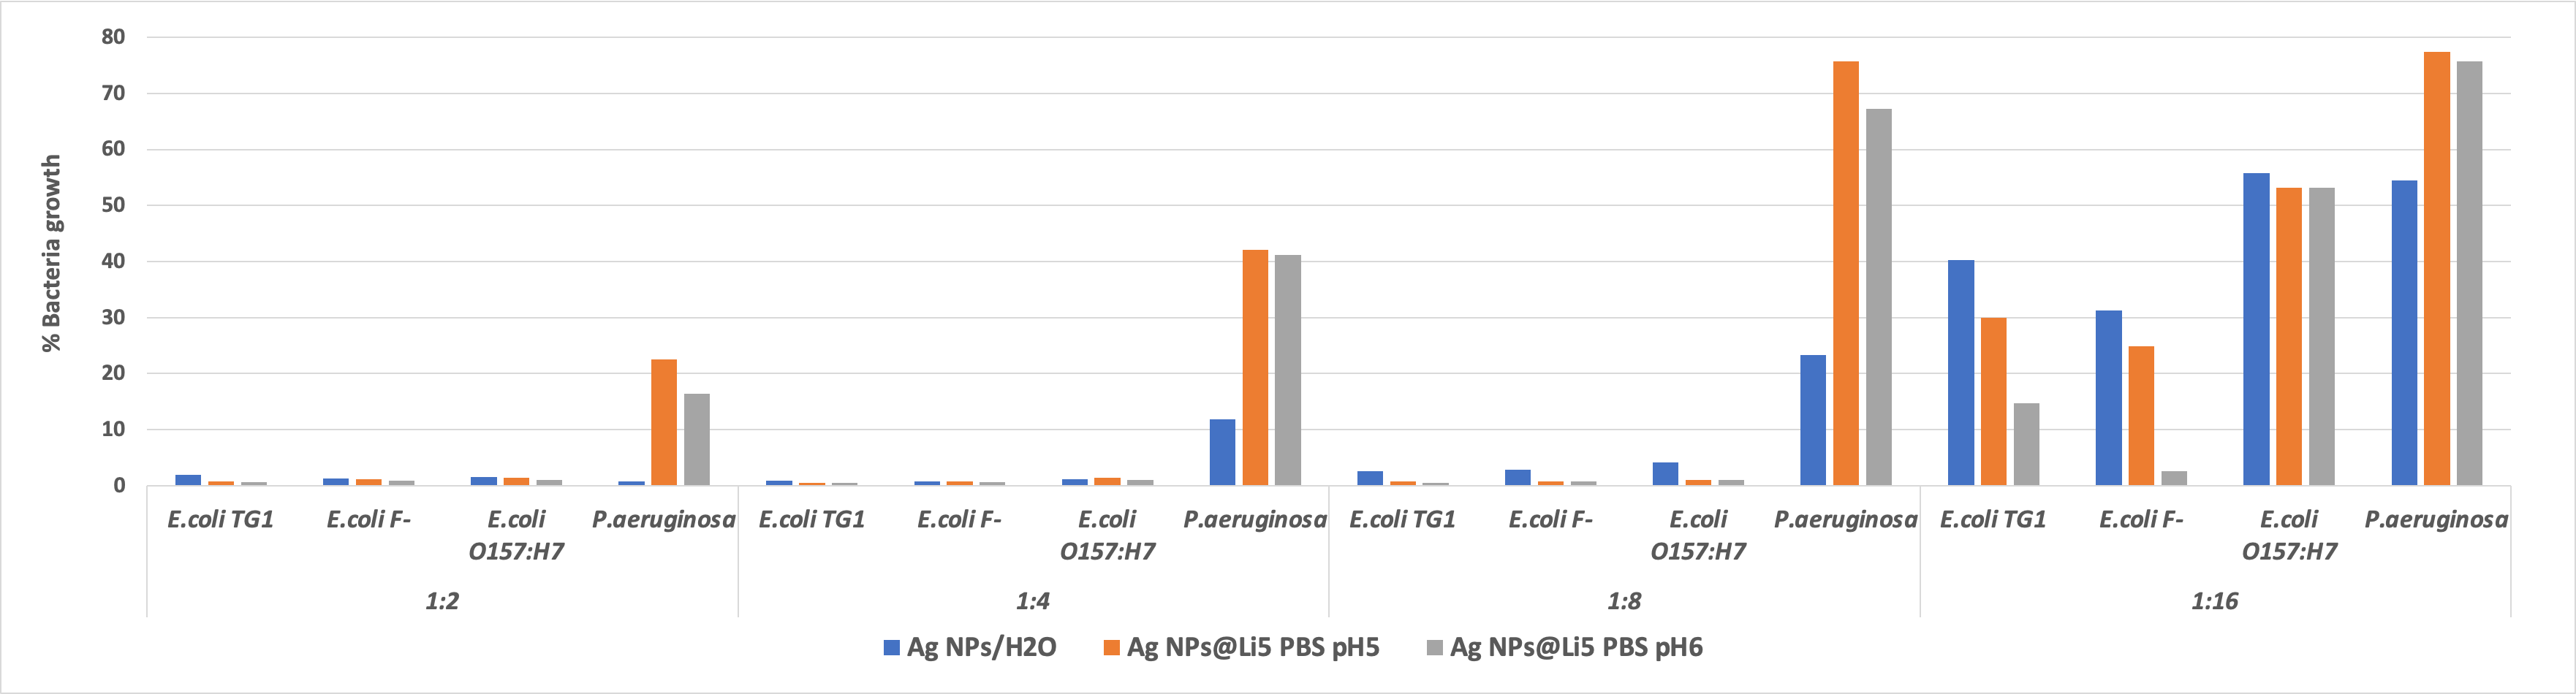


**Figure S3: Minimum Inhibitory Concentration. The figure shows the MIC of different dilutions of AgNPs@Li5 PBS pH 6, AgNPs@Li5 PBS pH 5, and AgNPs/H2O against E. coli TG1, E. coli F-, E. coli O157:H7, and *P. aeruginosa*. Each data point represents the average of three independent biological experiments. MICs are expressed as the percentage of bacterial growth relative to the control (bacteria without treatment). Lower MIC values indicate greater antibacterial potency.**


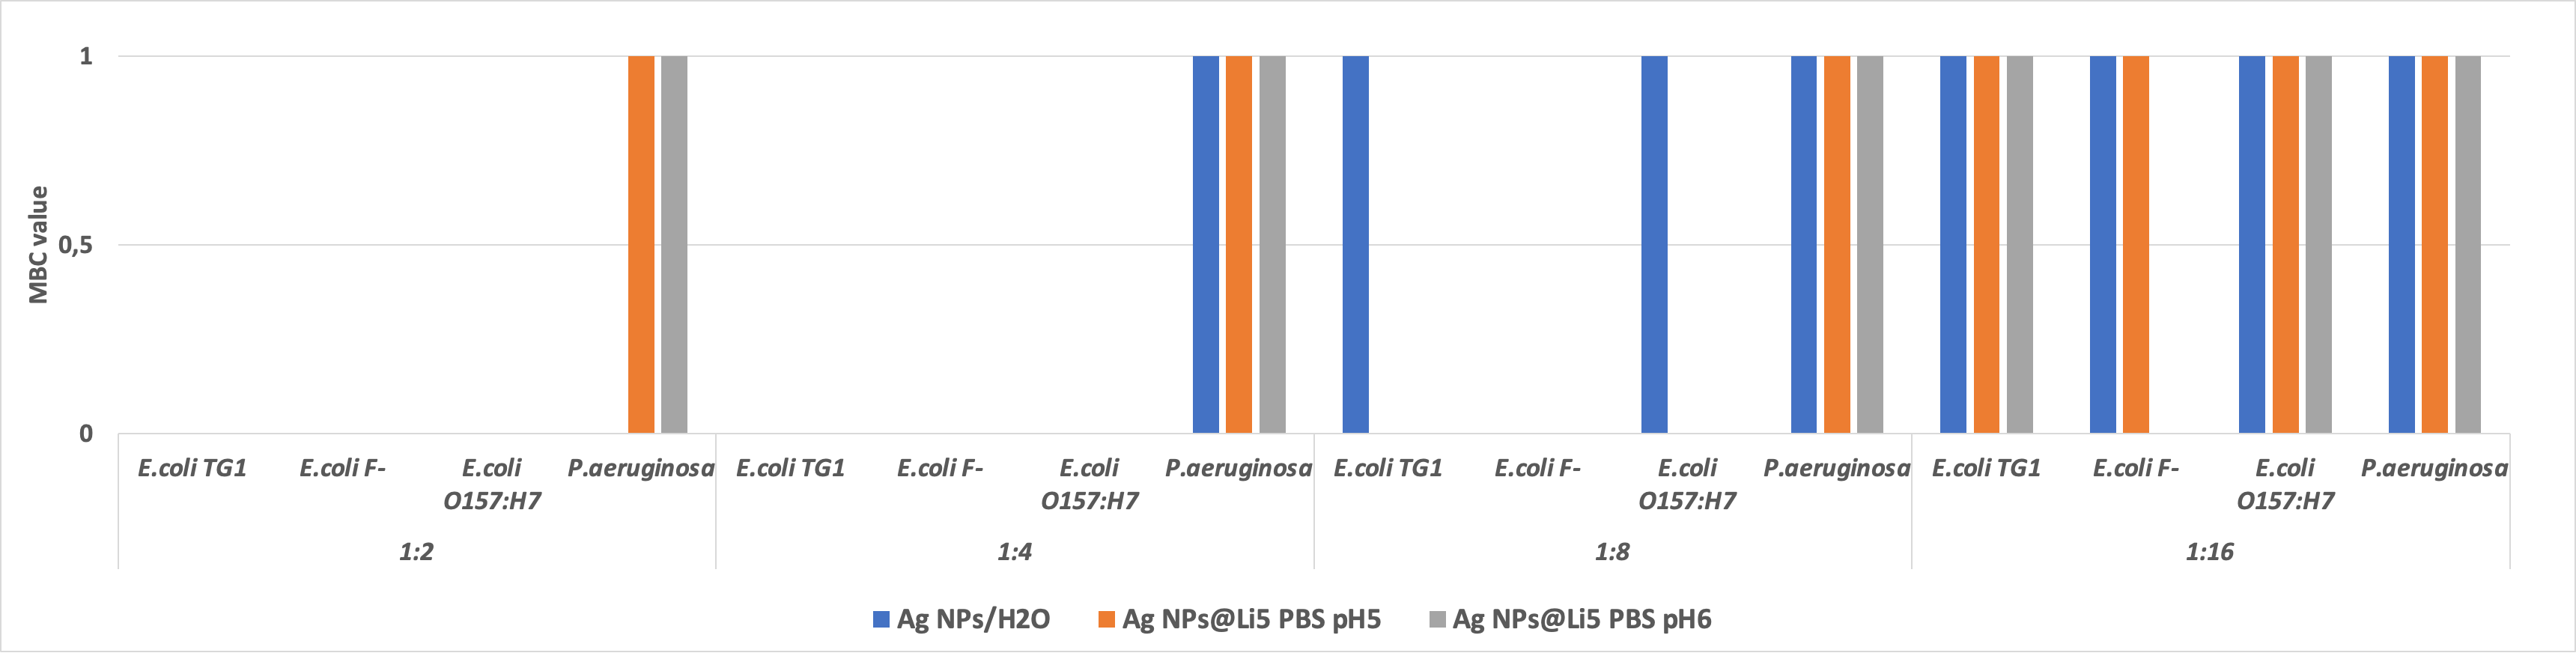


**Figure S4: Minimum Bactericidal Concentration (MBC). The graph shows the MBC of different dilutions of AgNPs@Li5 PBS pH 6, AgNPs@Li5 PBS pH 5, and AgNPs/H2O against E. coli TG1, E. coli F-, E. coli O157:H7, and P. aeruginosa. MBC values indicate the presence (value: 1) or absence (value: 0) of bacterial growth on agar plates. Each data point represents the average of three independent biological experiments. Lower MBC values indicate higher bactericidal potency. These values are useful for assessing the efficacy of different AgNP formulations in eradicating bacterial growth**.


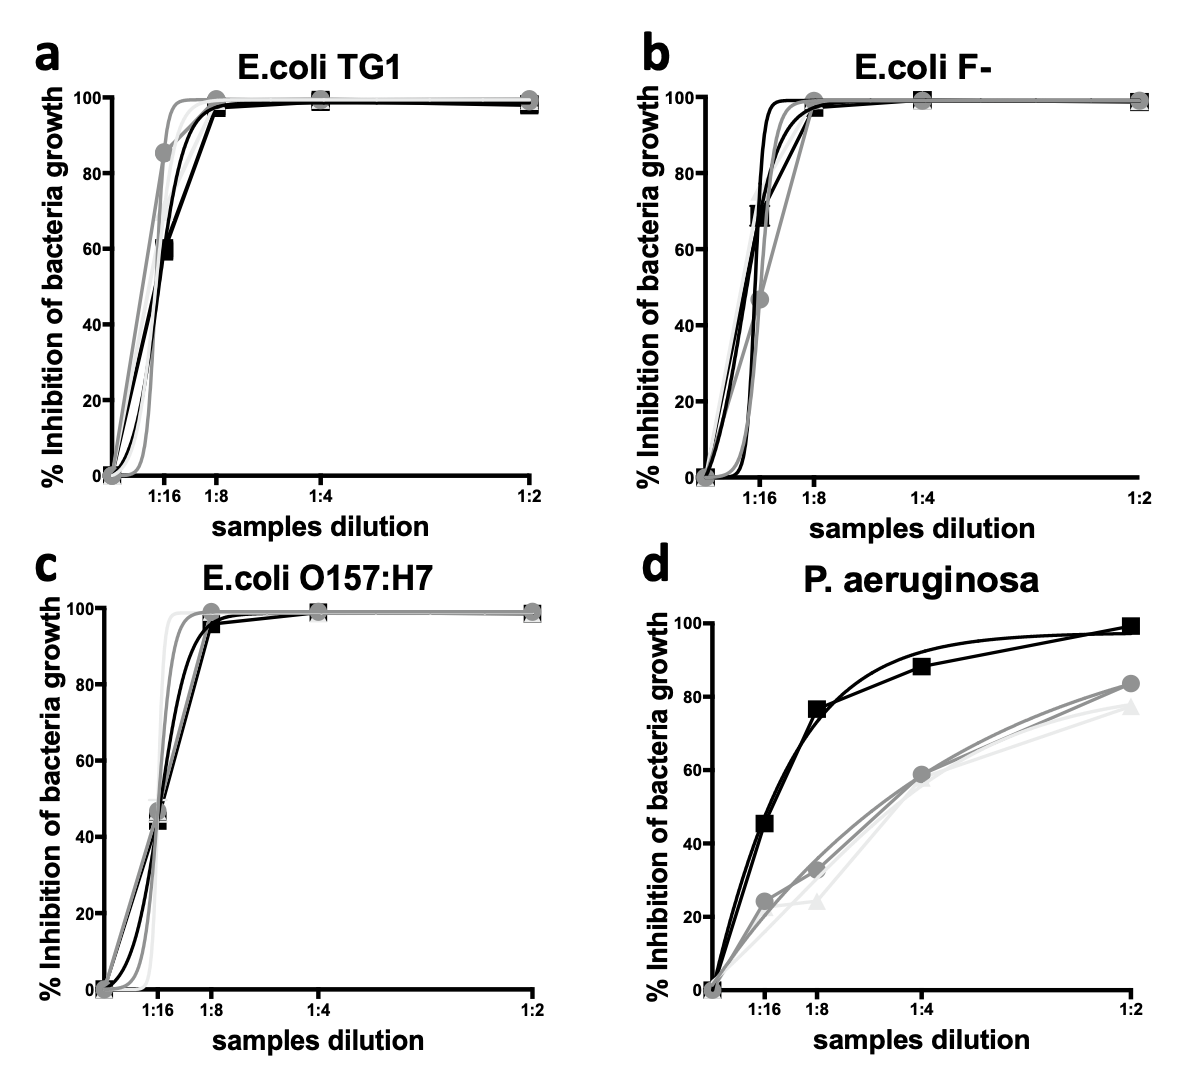


**Figure S5: Dose-response curve illustrating the relationship between AgNPs/H2O and AgNPs@Li5 complexes (at different dilutions) and the observed biological effect (expressed as % inhibition of bacterial growth).** The curve demonstrates a sigmoidal (S-shaped) pattern, with the effect increasing as dilution increases. The EC50 value represents the concentration at which 50% of the maximum response is achieved, while the Hill slope indicates the steepness of the curve, reflecting the system's sensitivity to changes in concentration.
